# Supplementary material for: Comprehensive Characterization of Microbial Community in the Female Genital Tract of Reproductive-Aged Women in China
Source: PubMed Central journal article supplement (PMC8482844; doi:10.3389/fcimb.2021.649067), 2021-09-16
Supplement: Image_2.pdf [file Image_2.pdf]

Kruskal-Wallis rank sum test p-value < 2.2e-16

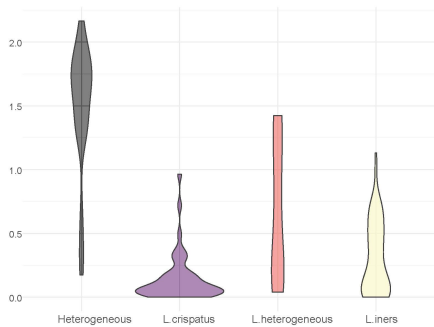

V Shannon Index

Kruskal-Wallis rank sum test p.value=1.168e-09

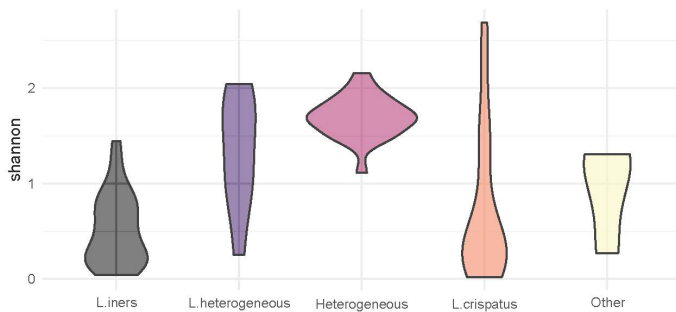

C Shannon Index

Kruskal-Wallis rank sum test p.value=0.0057

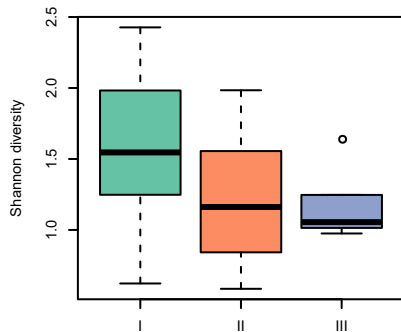

U Shannon Index
