# Supplementary material for: Comprehensive Characterization of Microbial Community in the Female Genital Tract of Reproductive-Aged Women in China
Source: PubMed Central journal article supplement (PMC8482844; doi:10.3389/fcimb.2021.649067), 2021-09-16

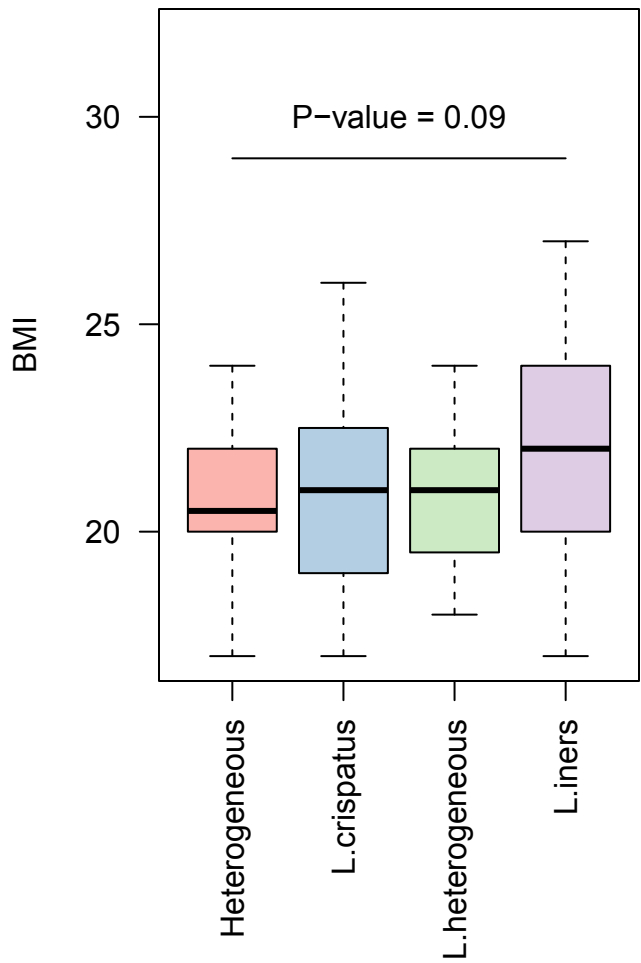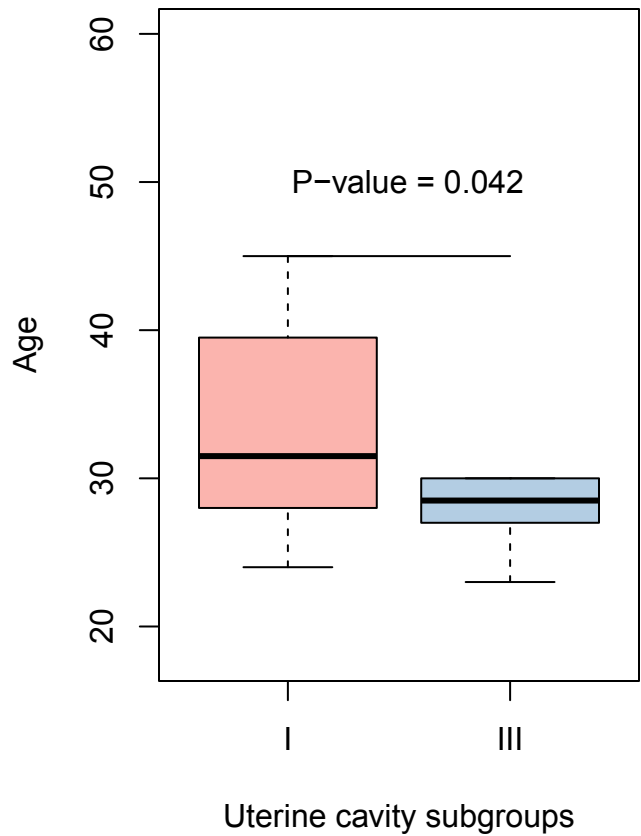

Supplement: Image_3.pdf [file Image_3.pdf]
